# Supplementary material
Source: MDPI journal article supplement (https://www.mdpi.com/2072-4292/14/18/4559)
Supplement: s1 [file s1]

## Supplementary Materials

**Table S1** Summary of datasets, the platform they were derived from, the dates used, their respective spatial resolution and reference details.

| Dataset                         | Platform      | Dates                                                                                                                               | Spatial Resolution (m) | Reference |
|---------------------------------|---------------|-------------------------------------------------------------------------------------------------------------------------------------|------------------------|-----------|
| Multispectral bands and indices | Worldview-2   | 23/07/2017,<br>24/04/2018,<br>02/08/2018,<br>27/04/2019,<br>18/09/2019,<br>20/03/2020,<br>26/09/2020,<br>23/04/2021 &<br>25/09/2021 | 0.5 to 2               | [104]     |
| Digital Elevation Model         | LiDAR         | Autumn 2018                                                                                                                         | 1                      | [105]     |
| Canopy Height Model             | LiDAR         | Autumn 2018                                                                                                                         | 1                      | [105]     |
| Aerial Imagery                  | Nearmap       | 25/07/2017,<br>11/05/2018,<br>09/09/2018,<br>24/03/2019,<br>27/10/2019,<br>17/04/2020,<br>29/10/2020,<br>08/05/2021 &<br>10/09/2021 | 7 cm                   | [48]      |
| Orthomosaic                     | DJI Phantom 4 | Autumn 2018                                                                                                                         | < 2 cm                 | [50]      |

**Table S2** Summary of the specifications of the Worldview-2 sensor.

| Worldview-2 Specifications | Variable            | Variable Specifications |
|----------------------------|---------------------|-------------------------|
| Panchromatic Band          | Panchromatic        | 450-800                 |
| Multi-Spectral Bands       | Coastal Blue        | 396-458                 |
|                            | Blue                | 442-525                 |
|                            | Green               | 506-586                 |
|                            | Yellow              | 584-632                 |
|                            | Red                 | 624-694                 |
|                            | Red-Edge            | 99-749                  |
|                            | NIR1                | 765-901                 |
|                            | NIR2                | 856-1043                |
| Sensor Characteristics     | Orbit Altitude      | 770 km                  |
|                            | Inclination Orbit   | 97.2°                   |
|                            | Swath (nadir)       | 16.4 km                 |
|                            | Revisitation Period | 14 days                 |

**Table S3** Confusion matrices that demonstrate the agreement and precision of validation points compared to classified outputs for each land cover map.

| 2017 Spring                 | Mixed<br>She-Oak and<br>Paperbark | Mixed<br>Shrubs<br>and<br>Grasses | Vegetation<br>Dieback | Common<br>Reed | Mangroves | Saltmarsh | Mangrove<br>Fern | Exposed<br>Soil | Water | Shadows | Total | Users'<br>Accuracy |
|-----------------------------|-----------------------------------|-----------------------------------|-----------------------|----------------|-----------|-----------|------------------|-----------------|-------|---------|-------|--------------------|
| Mixed She-Oak and Paperbark | 116                               | 0                                 | 0                     | 1              | 3         | 0         | 1                | 0               | 0     | 0       | 121   | 0.96               |
| Mixed Shrubs and Grasses    | 0                                 | 19                                | 0                     | 3              | 0         | 0         | 0                | 1               | 0     | 0       | 23    | 0.83               |
| Vegetation Dieback          | 3                                 | 0                                 | 28                    | 1              | 0         | 1         | 1                | 0               | 0     | 0       | 34    | 0.82               |
| Common Reed                 | 3                                 | 0                                 | 1                     | 54             | 0         | 2         | 0                | 0               | 0     | 0       | 60    | 0.90               |
| Mangroves                   | 1                                 | 0                                 | 0                     | 1              | 50        | 1         | 3                | 0               | 0     | 0       | 56    | 0.89               |
| Saltmarsh                   | 0                                 | 2                                 | 1                     | 2              | 0         | 32        | 0                | 0               | 0     | 0       | 37    | 0.86               |
| Mangrove Fern               | 0                                 | 0                                 | 0                     | 3              | 0         | 0         | 31               | 0               | 0     | 0       | 34    | 0.91               |
| Exposed Soil                | 0                                 | 1                                 | 0                     | 0              | 0         | 0         | 0                | 25              | 0     | 0       | 26    | 0.96               |
| Water                       | 0                                 | 0                                 | 1                     | 0              | 0         | 0         | 0                | 0               | 26    | 0       | 27    | 0.96               |
| Shadows                     | 1                                 | 0                                 | 0                     | 0              | 0         | 0         | 0                | 0               | 0     | 30      | 31    | 0.97               |
| <b>Total</b>                | 124                               | 22                                | 31                    | 65             | 53        | 36        | 36               | 26              | 26    | 30      | 411   |                    |
| <b>Producers' accuracy</b>  | 0.94                              | 0.86                              | 0.90                  | 0.83           | 0.94      | 0.89      | 0.86             | 0.96            | 1.00  | 1.00    |       |                    |
| 2018 Autumn                 | Mixed<br>She-Oak and<br>Paperbark | Mixed<br>Shrubs<br>and<br>Grasses | Vegetation<br>Dieback | Common<br>Reed | Mangroves | Saltmarsh | Mangrove<br>Fern | Exposed<br>Soil | Water | Shadows | Total | Users'<br>Accuracy |
| Mixed She-Oak and Paperbark | 151                               | 0                                 | 0                     | 1              | 0         | 0         | 0                | 0               | 0     | 2       | 154   | 0.98               |

|                             |                             |                          |                    |             |           |           |               |              |       |         |       |                 |
|-----------------------------|-----------------------------|--------------------------|--------------------|-------------|-----------|-----------|---------------|--------------|-------|---------|-------|-----------------|
| Mixed Shrubs and Grasses    | 0                           | 14                       | 0                  | 2           | 0         | 0         | 0             | 3            | 0     | 0       | 19    | 0.74            |
| Vegetation Dieback          | 1                           | 1                        | 32                 | 4           | 0         | 2         | 0             | 0            | 0     | 0       | 40    | 0.80            |
| Common Reed                 | 3                           | 0                        | 2                  | 98          | 0         | 2         | 0             | 0            | 0     | 0       | 105   | 0.93            |
| Mangroves                   | 1                           | 0                        | 0                  | 2           | 51        | 2         | 1             | 0            | 0     | 0       | 57    | 0.89            |
| Saltmarsh                   | 0                           | 0                        | 2                  | 2           | 0         | 34        | 0             | 0            | 0     | 0       | 38    | 0.89            |
| Mangrove Fern               | 0                           | 0                        | 1                  | 2           | 0         | 0         | 27            | 0            | 0     | 0       | 30    | 0.90            |
| Exposed Soil                | 0                           | 0                        | 0                  | 3           | 0         | 1         | 0             | 14           | 0     | 0       | 18    | 0.78            |
| Water                       | 0                           | 0                        | 0                  | 0           | 0         | 0         | 0             | 0            | 32    | 0       | 32    | 1.00            |
| Shadows                     | 1                           | 0                        | 0                  | 0           | 0         | 0         | 0             | 0            | 0     | 14      | 15    | 0.93            |
| <b>Total</b>                | 157                         | 15                       | 37                 | 114         | 51        | 41        | 28            | 17           | 32    | 16      | 467   |                 |
| <b>Producers' accuracy</b>  | 0.96                        | 0.93                     | 0.86               | 0.86        | 1.00      | 0.83      | 0.96          | 0.82         | 1.00  | 0.88    |       |                 |
| <b>2018 Spring</b>          | Mixed She-Oak and Paperbark | Mixed Shrubs and Grasses | Vegetation Dieback | Common Reed | Mangroves | Saltmarsh | Mangrove Fern | Exposed Soil | Water | Shadows | Total | Users' Accuracy |
| Mixed She-Oak and Paperbark | 267                         | 0                        | 0                  | 0           | 0         | 3         | 0             | 0            | 0     | 1       | 271   | 0.99            |
| Mixed Shrubs and Grasses    | 0                           | 35                       | 0                  | 3           | 0         | 1         | 0             | 1            | 0     | 0       | 40    | 0.88            |
| Vegetation Dieback          | 2                           | 0                        | 42                 | 0           | 1         | 0         | 0             | 0            | 0     | 0       | 45    | 0.93            |
| Common Reed                 | 0                           | 2                        | 0                  | 96          | 0         | 1         | 0             | 0            | 0     | 0       | 99    | 0.97            |
| Mangroves                   | 1                           | 0                        | 0                  | 0           | 59        | 1         | 0             | 0            | 0     | 0       | 61    | 0.97            |
| Saltmarsh                   | 2                           | 2                        | 3                  | 1           | 0         | 74        | 0             | 5            | 0     | 0       | 87    | 0.85            |

|                             |                             |                          |                    |             |           |           |               |              |       |         |       |                 |
|-----------------------------|-----------------------------|--------------------------|--------------------|-------------|-----------|-----------|---------------|--------------|-------|---------|-------|-----------------|
| Mangrove Fern               | 3                           | 0                        | 0                  | 0           | 2         | 0         | 30            | 0            | 0     | 0       | 35    | 0.86            |
| Exposed Soil                | 0                           | 2                        | 2                  | 2           | 0         | 6         | 0             | 41           | 0     | 0       | 53    | 0.77            |
| Water                       | 0                           | 2                        | 0                  | 0           | 0         | 0         | 0             | 2            | 48    | 0       | 52    | 0.92            |
| Shadows                     | 0                           | 2                        | 0                  | 1           | 1         | 0         | 0             | 0            | 2     | 30      | 36    | 0.83            |
| <b>Total</b>                | 275                         | 45                       | 47                 | 103         | 63        | 86        | 30            | 49           | 50    | 31      | 722   |                 |
| <b>Producers' accuracy</b>  | 0.97                        | 0.78                     | 0.89               | 0.93        | 0.94      | 0.86      | 1.00          | 0.84         | 0.96  | 0.97    |       |                 |
| <b>2019 Autumn</b>          | Mixed She-Oak and Paperbark | Mixed Shrubs and Grasses | Vegetation Dieback | Common Reed | Mangroves | Saltmarsh | Mangrove Fern | Exposed Soil | Water | Shadows | Total | Users' Accuracy |
| Mixed She-Oak and Paperbark | 148                         | 0                        | 0                  | 0           | 3         | 0         | 0             | 0            | 0     | 1       | 152   | 0.97            |
| Mixed Shrubs and Grasses    | 0                           | 28                       | 0                  | 9           | 0         | 0         | 0             | 0            | 1     | 0       | 38    | 0.74            |
| Vegetation Dieback          | 1                           | 0                        | 18                 | 2           | 0         | 1         | 0             | 0            | 0     | 0       | 22    | 0.82            |
| Common Reed                 | 1                           | 2                        | 1                  | 81          | 0         | 1         | 0             | 0            | 0     | 0       | 86    | 0.94            |
| Mangroves                   | 2                           | 0                        | 0                  | 0           | 49        | 0         | 0             | 0            | 0     | 0       | 51    | 0.96            |
| Saltmarsh                   | 3                           | 0                        | 0                  | 2           | 0         | 46        | 0             | 0            | 2     | 0       | 53    | 0.87            |
| Mangrove Fern               | 0                           | 0                        | 0                  | 0           | 0         | 0         | 27            | 0            | 0     | 0       | 27    | 1.00            |
| Exposed Soil                | 0                           | 1                        | 0                  | 1           | 0         | 1         | 0             | 6            | 0     | 0       | 9     | 0.67            |
| Water                       | 0                           | 1                        | 0                  | 0           | 0         | 0         | 0             | 0            | 27    | 0       | 28    | 0.96            |
| Shadows                     | 2                           | 1                        | 0                  | 1           | 0         | 0         | 0             | 0            | 0     | 26      | 30    | 0.87            |
| <b>Total</b>                | 157                         | 33                       | 19                 | 96          | 52        | 49        | 27            | 6            | 30    | 27      | 456   |                 |
| <b>Producers' accuracy</b>  | 0.94                        | 0.85                     | 0.95               | 0.84        | 0.94      | 0.94      | 1.00          | 1.00         | 0.90  | 0.96    |       |                 |

| <b>2019 Spring</b>          | Mixed<br>She-Oak and<br>Paperbark | Mixed<br>Shrubs<br>and<br>Grasses | Vegetation<br>Dieback | Common<br>Reed | Mangroves | Saltmarsh | Mangrove<br>Fern | Exposed<br>Soil | Water | Shadows | Total | Users'<br>Accuracy |
|-----------------------------|-----------------------------------|-----------------------------------|-----------------------|----------------|-----------|-----------|------------------|-----------------|-------|---------|-------|--------------------|
| Mixed She-Oak and Paperbark | 270                               | 0                                 | 0                     | 3              | 1         | 1         | 0                | 0               | 0     | 2       | 277   | 0.97               |
| Mixed Shrubs and Grasses    | 0                                 | 32                                | 0                     | 2              | 0         | 0         | 0                | 0               | 1     | 0       | 35    | 0.91               |
| Vegetation Dieback          | 1                                 | 0                                 | 16                    | 2              | 0         | 1         | 0                | 1               | 0     | 0       | 21    | 0.76               |
| Common Reed                 | 1                                 | 1                                 | 0                     | 76             | 0         | 0         | 0                | 0               | 0     | 0       | 78    | 0.97               |
| Mangroves                   | 4                                 | 0                                 | 0                     | 0              | 68        | 0         | 0                | 0               | 0     | 0       | 72    | 0.94               |
| Saltmarsh                   | 0                                 | 0                                 | 0                     | 0              | 0         | 63        | 0                | 0               | 0     | 0       | 63    | 1.00               |
| Mangrove Fern               | 2                                 | 0                                 | 0                     | 1              | 0         | 0         | 18               | 0               | 0     | 0       | 21    | 0.86               |
| Exposed Soil                | 0                                 | 1                                 | 1                     | 1              | 0         | 6         | 0                | 6               | 0     | 0       | 15    | 0.40               |
| Water                       | 1                                 | 1                                 | 0                     | 0              | 0         | 2         | 0                | 0               | 70    | 0       | 74    | 0.95               |
| Shadows                     | 1                                 | 0                                 | 0                     | 0              | 0         | 0         | 0                | 0               | 0     | 22      | 23    | 0.96               |
| <b>Total</b>                | 280                               | 35                                | 17                    | 85             | 69        | 73        | 18               | 7               | 71    | 24      | 641   |                    |
| <b>Producers' accuracy</b>  | 0.96                              | 0.91                              | 0.94                  | 0.89           | 0.99      | 0.86      | 1.00             | 0.86            | 0.99  | 0.92    |       |                    |
| <b>2020 Autumn</b>          | Mixed<br>She-Oak and<br>Paperbark | Mixed<br>Shrubs<br>and<br>Grasses | Vegetation<br>Dieback | Common<br>Reed | Mangroves | Saltmarsh | Mangrove<br>Fern | Exposed<br>Soil | Water | Shadows | Total | Users'<br>Accuracy |
| Mixed She-Oak and Paperbark | 134                               | 1                                 | 0                     | 4              | 2         | 0         | 0                | 0               | 0     | 1       | 142   | 0.94               |
| Mixed Shrubs and Grasses    | 2                                 | 45                                | 0                     | 0              | 0         | 0         | 0                | 0               | 3     | 0       | 50    | 0.90               |

|                             |                             |                          |                    |             |           |           |               |              |       |         |       |                 |
|-----------------------------|-----------------------------|--------------------------|--------------------|-------------|-----------|-----------|---------------|--------------|-------|---------|-------|-----------------|
| Vegetation Dieback          | 3                           | 0                        | 21                 | 1           | 1         | 2         | 0             | 0            | 0     | 0       | 28    | 0.75            |
| Common Reed                 | 4                           | 1                        | 1                  | 63          | 0         | 1         | 1             | 0            | 0     | 0       | 71    | 0.89            |
| Mangroves                   | 1                           | 0                        | 0                  | 0           | 49        | 0         | 0             | 0            | 0     | 1       | 51    | 0.96            |
| Saltmarsh                   | 0                           | 1                        | 0                  | 1           | 0         | 26        | 3             | 0            | 0     | 0       | 31    | 0.84            |
| Mangrove Fern               | 0                           | 0                        | 0                  | 3           | 0         | 0         | 21            | 0            | 0     | 0       | 24    | 0.88            |
| Exposed Soil                | 0                           | 0                        | 0                  | 0           | 0         | 0         | 0             | 11           | 0     | 0       | 11    | 1.00            |
| Water                       | 1                           | 0                        | 0                  | 0           | 0         | 2         | 0             | 0            | 45    | 0       | 48    | 0.94            |
| Shadows                     | 1                           | 0                        | 0                  | 0           | 0         | 1         | 0             | 0            | 0     | 10      | 12    | 0.83            |
| <b>Total</b>                | 146                         | 48                       | 22                 | 72          | 52        | 32        | 25            | 11           | 48    | 12      | 425   |                 |
| <b>Producers' accuracy</b>  | 0.92                        | 0.94                     | 0.95               | 0.88        | 0.94      | 0.81      | 0.84          | 1.00         | 0.94  | 0.83    |       |                 |
| <b>2020 Spring</b>          | Mixed She-Oak and Paperbark | Mixed Shrubs and Grasses | Vegetation Dieback | Common Reed | Mangroves | Saltmarsh | Mangrove Fern | Exposed Soil | Water | Shadows | Total | Users' Accuracy |
| Mixed She-Oak and Paperbark | 156                         | 0                        | 1                  | 3           | 1         | 0         | 0             | 0            | 0     | 1       | 162   | 0.96            |
| Mixed Shrubs and Grasses    | 1                           | 44                       | 0                  | 0           | 0         | 0         | 0             | 1            | 0     | 0       | 46    | 0.96            |
| Vegetation Dieback          | 1                           | 0                        | 31                 | 1           | 1         | 0         | 0             | 0            | 0     | 0       | 34    | 0.91            |
| Common Reed                 | 5                           | 1                        | 0                  | 82          | 0         | 1         | 0             | 0            | 0     | 0       | 89    | 0.92            |
| Mangroves                   | 4                           | 0                        | 1                  | 1           | 59        | 1         | 0             | 0            | 0     | 0       | 66    | 0.89            |
| Saltmarsh                   | 0                           | 0                        | 1                  | 2           | 0         | 45        | 0             | 0            | 1     | 0       | 49    | 0.92            |
| Mangrove Fern               | 0                           | 0                        | 0                  | 3           | 1         | 0         | 27            | 0            | 0     | 0       | 31    | 0.87            |
| Exposed Soil                | 0                           | 2                        | 2                  | 1           | 0         | 2         | 0             | 29           | 0     | 0       | 36    | 0.81            |

|                             |                             |                          |                    |             |           |           |               |              |       |         |       |                 |
|-----------------------------|-----------------------------|--------------------------|--------------------|-------------|-----------|-----------|---------------|--------------|-------|---------|-------|-----------------|
| Water                       | 0                           | 0                        | 0                  | 0           | 0         | 0         | 0             | 1            | 21    | 1       | 23    | 0.91            |
| Shadows                     | 0                           | 0                        | 0                  | 0           | 0         | 1         | 0             | 0            | 1     | 10      | 12    | 0.83            |
| <b>Total</b>                | 167                         | 47                       | 36                 | 93          | 62        | 50        | 27            | 31           | 23    | 12      | 504   |                 |
| <b>Producers' accuracy</b>  | 0.93                        | 0.94                     | 0.86               | 0.88        | 0.95      | 0.90      | 1.00          | 0.94         | 0.91  | 0.83    |       |                 |
| <b>2021 Autumn</b>          | Mixed She-Oak and Paperbark | Mixed Shrubs and Grasses | Vegetation Dieback | Common Reed | Mangroves | Saltmarsh | Mangrove Fern | Exposed Soil | Water | Shadows | Total | Users' Accuracy |
| Mixed She-Oak and Paperbark | 149                         | 0                        | 0                  | 0           | 4         | 1         | 1             | 0            | 0     | 1       | 156   | 0.96            |
| Mixed Shrubs and Grasses    | 1                           | 26                       | 0                  | 0           | 0         | 0         | 0             | 0            | 1     | 0       | 28    | 0.93            |
| Vegetation Dieback          | 2                           | 0                        | 17                 | 0           | 0         | 0         | 0             | 0            | 0     | 0       | 19    | 0.89            |
| Common Reed                 | 1                           | 1                        | 1                  | 131         | 1         | 2         | 0             | 0            | 0     | 0       | 137   | 0.96            |
| Mangroves                   | 3                           | 0                        | 0                  | 0           | 56        | 0         | 0             | 0            | 0     | 0       | 59    | 0.95            |
| Saltmarsh                   | 2                           | 0                        | 0                  | 3           | 1         | 57        | 0             | 0            | 0     | 1       | 64    | 0.89            |
| Mangrove Fern               | 6                           | 0                        | 0                  | 0           | 1         | 1         | 28            | 0            | 0     | 1       | 37    | 0.76            |
| Exposed Soil                | 0                           | 0                        | 0                  | 0           | 0         | 0         | 0             | 13           | 0     | 0       | 13    | 1.00            |
| Water                       | 0                           | 0                        | 0                  | 0           | 0         | 0         | 0             | 0            | 61    | 1       | 62    | 0.98            |
| Shadows                     | 2                           | 0                        | 0                  | 1           | 0         | 0         | 0             | 0            | 1     | 39      | 43    | 0.91            |
| <b>Total</b>                | 166                         | 27                       | 18                 | 135         | 63        | 61        | 29            | 13           | 63    | 43      | 577   |                 |
| <b>Producers' accuracy</b>  | 0.90                        | 0.96                     | 0.94               | 0.97        | 0.89      | 0.93      | 0.97          | 1.00         | 0.97  | 0.91    |       |                 |
| <b>2021 Spring</b>          | Mixed She-Oak and Paperbark | Mixed Shrubs and Grasses | Vegetation Dieback | Common Reed | Mangroves | Saltmarsh | Mangrove Fern | Exposed Soil | Water | Shadows | Total | Users' Accuracy |



|                             |      |      |      |      |      |      |      |      |      |      |     |      |
|-----------------------------|------|------|------|------|------|------|------|------|------|------|-----|------|
| Mixed She-Oak and Paperbark | 161  | 0    | 0    | 4    | 2    | 0    | 0    | 0    | 0    | 0    | 167 | 0.96 |
| Mixed Shrubs and Grasses    | 0    | 13   | 0    | 0    | 0    | 0    | 0    | 0    | 2    | 0    | 15  | 0.87 |
| Vegetation Dieback          | 1    | 0    | 24   | 0    | 2    | 0    | 0    | 0    | 0    | 0    | 27  | 0.89 |
| Common Reed                 | 0    | 0    | 0    | 82   | 0    | 1    | 0    | 1    | 0    | 0    | 84  | 0.98 |
| Mangroves                   | 3    | 0    | 0    | 0    | 72   | 4    | 1    | 0    | 0    | 0    | 80  | 0.90 |
| Saltmarsh                   | 1    | 0    | 0    | 3    | 1    | 49   | 0    | 0    | 0    | 0    | 54  | 0.91 |
| Mangrove Fern               | 0    | 0    | 0    | 1    | 1    | 2    | 36   | 0    | 0    | 0    | 40  | 0.90 |
| Exposed Soil                | 0    | 0    | 0    | 0    | 0    | 0    | 0    | 56   | 8    | 0    | 64  | 0.88 |
| Water                       | 0    | 0    | 0    | 0    | 0    | 1    | 0    | 6    | 63   | 1    | 71  | 0.89 |
| Shadows                     | 0    | 0    | 0    | 0    | 0    | 0    | 0    | 0    | 1    | 48   | 49  | 0.98 |
| <b>Total</b>                | 166  | 13   | 24   | 90   | 78   | 57   | 37   | 63   | 74   | 49   | 604 |      |
| <b>Producers' accuracy</b>  | 0.97 | 1.00 | 1.00 | 0.91 | 0.92 | 0.86 | 0.97 | 0.89 | 0.85 | 0.98 |     |      |

**Table S4** Generalised Linear Models (GLMs) summarising changes in the area of wetland vegetation classes over a period of 48 months, between Spring 2017 and 2021 over-time. Arrows illustrate the direction of change, as an increase in area (↑), a decrease in area (↓) or no consistent pattern of change (-).

| Land cover Class            | Res.DF | Res.Dev | Trend | P Value |
|-----------------------------|--------|---------|-------|---------|
| Mangroves                   | 7      | 0.60    | ↑     | 0.037   |
| Mangrove fern               | 7      | 1.06    | ↑     | 0.007   |
| Mixed she-oak and paperbark | 7      | 70.61   | ↑     | 0.014   |
| Mixed shrubs and grasses    | 7      | 9.64    | ↓     | <0.001  |
| Common Reed                 | 7      | 62.78   | ↓     | <0.001  |
| Saltmarsh                   | 7      | 60.261  | -     | 0.672   |
| Vegetation dieback          | 7      | 175.83  | -     | 0.429   |
| Exposed soil                | 7      | 447.16  | -     | 0.703   |
| Tidal water                 | 7      | 442.40  | -     | 0.072   |
